# Supplementary material
Source: PubMed Central journal article supplement (PMC6348716)
Supplement: rcmb.2017-0289OC_hohmann_data_supplement.pdf [file rcmb.2017-0289OC_hohmann_data_supplement.pdf]

**Online Data Supplement**

**Quercetin Eliminates Senescent Fibroblasts and Diminishes  
Pulmonary Fibrosis in Aged Mice.**

Miriam S. Hohmann, David M. Habel, Ana L. Coelho,

Waldiceu A. Verri, Jr, Cory M. Hogaboam.

## **Methods**

### **Isolation of primary pulmonary fibroblast lines**

IPF lung fibroblasts were cultured from surgical lung biopsies acquired from clinically classified IPF patients with rapid or stable progressing disease. Normal lung fibroblasts were cultured from lung samples obtained from normal subjects. The lung tissues were finely minced and the dispersed tissue pieces were placed into 150-cm<sup>2</sup> cell culture flasks with complete media. Cells were serially passaged a total of five times to yield pure populations of lung fibroblasts.

### **Cell counting**

Quantification of number of fibroblasts was performed on MACSQuant 10 (Miltenyi Biotech) flow cytometer and data were analyzed using Flowjo software (Treestar Inc.).

### **Caspase-3 activity**

Caspase-3 activity was measured using the Caspase-3 Fluorometric Assay Kit (BioVision). First, the 96-well plates were centrifuged at 400 x *g*, conditioned supernatant was removed from the wells, and the cells were lysed with Cell Lysis Buffer for 30 min on ice. Next, 2x Reaction Buffer containing 10 mM DTT and 50 μM DEVD-AFC substrate were added to lysed samples and incubated at 37°C for 1 h. Samples were read in a

fluorometer equipped with a 400 nm excitation filter and 505 nm emission filter and results were expressed as relative fluorescence units (RFU) normalized to  $\beta$ -actin.

### **Cell viability**

For cell viability assay, the supernatant was removed from the wells containing the cultured fibroblasts were washed twice with DPBS. The TetraZ solution provided in the TetraZ Cell Counting Kit (Biolegend) was added to the wells and incubated for 2 h at 37°C and 10% CO<sub>2</sub>. The absorbance at 450 nm was directly proportional to the number of viable cells.

### **LDH release**

The release of LDH by dying cells was assessed in the conditioned supernatant following the manufacturer's instructions (Pierce LDH Cytotoxicity Assay Kit, Life technologies). Briefly, the fibroblast-conditioned supernatant was transferred to a new 96-well plate containing the kit Reaction Mixture. Samples were incubated at room temperature for 30 min and adding Stop Solution stopped reactions. The absorbance at 490 nm and 680 nm was measured using a plate-reading spectrophotometer to determine LDH activity.

## **Hydroxyproline Assay**

Hydroxyproline content in whole mouse lungs was used to quantify lung collagen content and was measured colorimetrically. At the time of killing, all lobes of lung were removed and the extrapulmonary airways and blood vessels excised and discarded. The lung parenchyma was homogenized in 0.5 mL of ultra-pure water, after which 25  $\mu$ L of sample was transferred to another tube. Next, 0.580 mL of 12 N HCl was added, and the samples were hydrolyzed at 120°C overnight. 50  $\mu$ L of each sample were transferred into uncapped microtubes and incubated at 100°C for 2 h to promote evaporation. First, 50  $\mu$ L of citrate-acetate buffer (5% citric acid, 1.2% glacial acetic acid, 7.25% sodium acetate, and 3.4% sodium hydroxide) was added. Next, 1 mL 100/80 of chloramine-T solution (1.4% chloramine-T, 10% N-propanol, and 80% citrate-acetate buffer) was added, and the mixture was incubated for 20 min at room temperature. Ehrlich's solution was added and the samples were incubated at 65°C for 20 min. Absorbance was measured at 550 nm. A standard curve was generated for each experiment using reagent hydroxyproline (Sigma-Aldrich) as a standard. Results were expressed as  $\mu$ g of hydroxyproline/mg of protein.

## **Histologic Analysis**

For histologic analysis of the lungs, the whole left lobe was formalin-fixed and paraffin-embedded. Lung sections (5  $\mu$ m) were stained with Masson's trichrome stain to visualize collagen deposition and representative images at 100x magnification were presented.

## **Reactive oxygen species (ROS) levels**

Lung fibroblasts were treated with quercetin (50  $\mu$ M) or vehicle (0.05% DMSO) for 24 hours and total intracellular ROS and hydrogen peroxide ( $H_2O_2$ ) release was determined. Intracellular ROS levels were measured by flow cytometry using the CellROX Green Flow Cytometry Assay Kit (Life Technologies). Geometric mean fluorescence intensity (GMFI) was acquired using Flowjo (Treestar inc.).  $H_2O_2$  levels were measured using the Amplex Red Hydrogen Peroxide/Peroxidase Assay Kit (ThermoFisher Scientific).

### **Western Blot antibodies**

Anti-p-AKT (Ser473) and -AKT (pan) (Cell Signaling Technology), -Caveolin-1 (ThermoScientific), - $\beta$ -actin (Santa Cruz Biotechnology), -p21 (abcam), and -p19 ARF (abcam).

**Table E1. Human TaqMan Primers and probes ID for qPCR**

| <b>Genes</b>  | <b>ID</b>     |
|---------------|---------------|
| <i>18S</i>    | Hs99999901_s1 |
| <i>ACTA1</i>  | Hs00559403_m1 |
| <i>AXL</i>    | Hs01064444_m1 |
| <i>BMP4</i>   | Hs03676628_s1 |
| <i>CCND3</i>  | Hs01017690_g1 |
| <i>CDKN1A</i> | Hs00355782_m1 |
| <i>CDKN2A</i> | Hs00923894_m1 |
| <i>COL1A1</i> | Hs00164004_m1 |
| <i>COL3A1</i> | Hs00943809_m1 |
| <i>CTGF</i>   | Hs01026927_g1 |
| <i>CXCL12</i> | Hs03676656_mH |
| <i>FASLG</i>  | Hs00181225_m1 |
| <i>FGF10</i>  | Hs00610298_m1 |
| <i>FN1</i>    | Hs00365052_m1 |
| <i>GAS6</i>   | Hs01090305_m1 |
| <i>GPX3</i>   | Hs01078668_m1 |

|                |               |
|----------------|---------------|
| <i>GSR</i>     | Hs00167317_m1 |
| <i>GSS</i>     | Hs01047959_m1 |
| <i>HIF1A</i>   | Hs00153153_m1 |
| <i>HMOX1</i>   | Hs01110250_m1 |
| <i>IFNA1</i>   | Hs00855471_g1 |
| <i>IFNB1</i>   | Hs01077958_s1 |
| <i>IGF1</i>    | Hs01547656_m1 |
| <i>IGF1R</i>   | Hs00609566_m1 |
| <i>IL13RA2</i> | Hs00152924_m1 |
| <i>IL17RA</i>  | Hs01064648_m1 |
| <i>IL1A</i>    | Hs00174092_m1 |
| <i>IL1B</i>    | Hs01555410_m1 |
| <i>IL33</i>    | Hs00369211_m1 |
| <i>IL6</i>     | Hs00985639_m1 |
| <i>IL8</i>     | Hs00174103_m1 |
| <i>KIT</i>     | Hs00174029_m1 |
| <i>KITLG</i>   | Hs00241497_m1 |
| <i>KRT14</i>   | Hs00265033_m1 |

|                 |               |
|-----------------|---------------|
| <i>KRT5</i>     | Hs00361185_m1 |
| <i>LGALS3</i>   | Hs00173587_m1 |
| <i>MMP28</i>    | Hs01020031_m1 |
| <i>NOX4</i>     | Hs00418356_m1 |
| <i>PDGFB</i>    | Hs00966522_m1 |
| <i>PGF</i>      | Hs00182176_m1 |
| <i>RAC2</i>     | Hs01036635_s1 |
| <i>SERPINE1</i> | Hs01126606_m1 |
| <i>SOD2</i>     | Hs00167309_m1 |
| <i>TGFB1</i>    | Hs00998133_m1 |
| <i>TNF</i>      | Hs01113624_g1 |
| <i>TNFSF10</i>  | Hs00921974_m1 |
| <i>TWIST2</i>   | Hs02379973_s1 |
| <i>TXN</i>      | Hs01555214_g1 |
| <i>WNT5A</i>    | Hs00998537_m1 |



**Table E2. Human Primer sequence for qPCR**

| <b>Genes</b> | <b>Sequence</b>                                                                     |
|--------------|-------------------------------------------------------------------------------------|
| <i>18S</i>   | Forward: 5'-AACCCGTTGAACCCATT-3'<br>Reverse: 5'-CCATCCAATGCGTAGTAGCG-3'             |
| <i>CAV1</i>  | Forward: 5'-CAGGGAAACCTCCTCACAG-3'<br>Reverse: 5'-TGTAGAGATGTCCCTCCGA-3'            |
| <i>DR4</i>   | Forward: 5'-CAGAACGTCCTGGAGCCTGTAAC-3'<br>Reverse: 5'-ATGTCCATTGCCTGATTCTTT GTG-3'  |
| <i>DR5</i>   | Forward: 5'-GCGAAGAAGATTCTCCTGAGATGTG-3'<br>Reverse: 5'-ACATTGTCCTCAGCCCCAGGTCG -3' |
| <i>FAS</i>   | Forward: 5'-GGTTCTTACGTCTGTTGCT-3'<br>Reverse: 5'-CATGTTACATCTGGAGGAC-3'            |
| <i>HO1</i>   | Forward: 5'-GCCAGGTGCTCAAAAAGATT3'<br>Reverse: 5'-CCTGCAACTCCTCAAAAAGAGC3'          |
| <i>IL6</i>   | Forward: 5'-ATGTAGCCGCACACAGA-3'<br>Reverse: 5'-ATTTGCCGAAGAGCCCCTCAG-3'            |

|             |                                                                            |
|-------------|----------------------------------------------------------------------------|
| <i>IL8</i>  | Forward: 5'-AGAGTCATTGAGAGTGGACC-3'<br>Reverse: 5'-ACTTCTCCACAACCCTCTG-3'  |
| <i>NOX4</i> | Forward: 5'-GGAGAGCCAGATGAACAGG-3'<br>Reverse: 5'-CTCAGTCTTTGACCCTCGG3-'   |
| <i>NRF2</i> | Forward: 5'-GAGAGCCCAGTCTTCATTGC-3'<br>Reverse: 5'-TTGGCTTCTGGACTTGGAAC-3' |

**Table E3. Mouse Primer sequence for qPCR**

| <b>Genes</b>  | <b>Sequence</b>                                                                       |
|---------------|---------------------------------------------------------------------------------------|
| <i>Gapdh</i>  | Forward: 5'- CATACCAGGAAATGAGCTTG-3'<br>Reverse: 5'- ATGACATCAAGAAGGTGGTG-3'          |
| <i>Fasl</i>   | Forward: 5'- ATCCCTCTGGAATGGGAAGA -3'<br>Reverse: 5'- CCATATCTGTCCAGTAGTGC -3'        |
| <i>Trail</i>  | Forward: 5'- GAAGACCTCAGAAAGTGGC-3'<br>Reverse: 5'- GACCAGCTCTCCATTCTTA-3'            |
| <i>Cdkn2a</i> | Forward: 5'- CGGGACATCAAGACATCGT -3'<br>Reverse: 5'- GCCGGATTTAGCTCTGCTCT -3'         |
| <i>Cdkn1a</i> | Forward: 5'- ACATCTCAGGGCCGAAAACG -3'<br>Reverse: 5'- AAGACACACAGAGTGAGGGC -3'        |
| <i>Cdkn2d</i> | Forward: 5'- CTGGAAGAAGTCTGCGTCGG -3'<br>Reverse: 5'- GTCTTGCCAAAGCGGTCAG -3'         |
| <i>Mmp12</i>  | Forward: 5'- TGTACCCACCTACAGATACCTTA -3'<br>Reverse: 5'- CCATAGAGGGACTGAATGTTACGT -3' |
|               | Forward: 5'- CCAACTCTCACTGAAGCCAGCTCT -3'                                             |

|             |                                                                                        |
|-------------|----------------------------------------------------------------------------------------|
| <i>Mcp1</i> | Reverse: 5'- TCAGCACAGACCTCTCTTTGAGC -3'                                               |
| <i>I16</i>  | Forward: 5'- GAGGATACCACTCCCAACAGACC -3'<br>Reverse: 5'- AAGTGCATCATCGTTGTTTCATACA -3' |

## Figure legends

**Figure E1. Serial passage leads to replicative senescence in human lung fibroblasts.** (A) Number of passages necessary for fibroblasts to become senescent, (B) representative phase-contrast images of proliferating age and senescent fibroblasts at late passage, and (C) *CDKN1A*, *CDKN2A*, *IL6*, and *IL8* mRNA expression in senescent fibroblasts. Images were taken at 10X and 40X magnification. Data are presented as means  $\pm$  SEM, n = 3 - 4 per group. \* $P \leq 0.05$ , \*\* $P \leq 0.01$ , and \*\*\* $P \leq 0.001$  as indicated by the bars.

**Figure E2. Quercetin alone does not induce apoptosis in senescent primary lung fibroblasts.** Caspase-3 activity, cell viability, and lactate dehydrogenase (LDH) release by senescent lung fibroblasts from normal patients (NL) and patients with stable (or rapidly progressing IPF (stable IPF and rapid IPF, respectively) following 24 hours treatment with quercetin (50 or 100  $\mu$ M) or vehicle (0.05%DMSO). Caspase-3 activity was expressed as relative fluorescence units (RFU) normalized to  $\beta$ -actin levels, cell viability

as OD values at 450 nm, and LDH release as the difference in the absorbance values at 490 and 680 nm. Data are presented as means  $\pm$  SEM, n = 3 - 4 per group.

**Figure E3. Representative phase-contrast images of senescent human lung fibroblasts** derived from normal patients (NL) (A - D) and patients with stable (E - H) or rapidly progressing (I - L) IPF (stable IPF and rapid IPF, respectively) treated with: vehicle, quercetin (50  $\mu$ M), FasL (75 ng/mL), quercetin + FasL for 24 hours. Images were taken at 10x magnification and n = 3 per group.

**Figure E4. Quercetin increases the susceptibility to TRAIL-induced apoptosis in senescent human lung fibroblasts.** Caspase-3 activity, cell viability, and lactate dehydrogenase (LDH) release by senescent fibroblasts from normal lungs (NL) (A-C) and the lungs of patients with stable (D-F) or rapidly progressing (G-I) IPF (stable IPF and rapid IPF, respectively) following 24 hours treatment with vehicle (0.05%DMSO), quercetin (50  $\mu$ M), TRAIL (100 ng/mL), or quercetin + TRAIL. Caspase-3 activity was expressed as relative fluorescence units (RFU) normalized to  $\beta$ -actin levels, cell viability as OD values at 450 nm, and LDH release as the difference in the absorbance values at 490 and 680 nm. Data are presented as means  $\pm$  SEM, n = 3-4 per group. \* $P \leq 0.05$ , \*\* $P \leq 0.01$ , \*\*\* $P \leq 0.001$ , and \*\*\*\* $P \leq 0.0001$  as indicated by the bars.

**Figure E5. Representative phase-contrast images of senescent human lung fibroblasts** derived from normal patients (NL) (A – D) and patients with stable (E – H) or rapidly progressing (I – L) IPF (stable IPF and rapid IPF, respectively) treated with: vehicle, quercetin (50  $\mu$ M), cross-linked TRAIL (TRAIL) (100 ng/mL), quercetin + TRAIL for 24 hours. Images were taken at 10x magnification and n = 3 per group.

**Figure E6. Quercetin's effect is independent of the oxidative status in senescent human lung fibroblasts.** Effect of quercetin (50  $\mu$ M, 24 hours) on (A) total intracellular reactive oxygen species (ROS) levels, (B) hydrogen peroxide levels in the conditioned supernatant, and (C) *NOX4* and (D) *NRF2* mRNA expression in senescent lung fibroblasts isolated from normal patients (NL) and patients with stable or rapidly progressing IPF (stable IPF and rapid IPF, respectively). Data for ROS levels were expressed as geometric mean fluorescence intensity (GMFI) and hydrogen peroxide levels as relative fluorescence units (RFU). Data are presented as means  $\pm$  SEM, n = 3-4 per group.

**Figure E7. Whole lung (A) FasL and (B) TRAIL mRNA expression 7, 14, and 28 days post bleomycin-induced injury.** Data are presented as means  $\pm$  SEM, n = 7 mice per group. \* $P \leq 0.05$ , \*\* $P \leq 0.01$ , and \*\*\* $P \leq 0.001$  as indicated by the bars.

**Figure E8. Masson's trichrome blue staining for collagen in the lungs of aged mice.**

Aged C57BL/6 mice received intratracheal (i.tr.) instillation of bleomycin (1.25 U/kg) or saline (equal volume). (A) Masson's trichrome staining for collagen at day 7 (100x magnification). n = 7-10 mice per group.



Figure E1

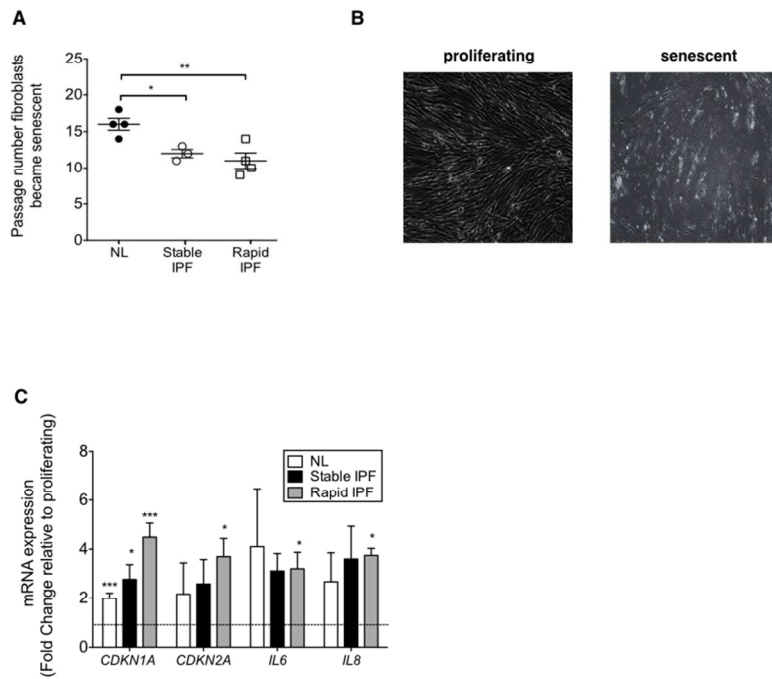

Figure E1. Serial passage leads to replicative senescence in human lung fibroblasts. (A) Number of passages necessary for fibroblasts to become senescent, (B) representative phase-contrast images of proliferating age and senescent fibroblasts at late passage, and (C) CDKN1A, CDKN2A, IL6, and IL8 mRNA expression in senescent fibroblasts. Images were taken at 10X and 40X magnification. Data are presented as means  $\pm$  SEM, n = 3 - 4 per group. \*P  $\leq$  0.05, \*\*P  $\leq$  0.01, and \*\*\*P  $\leq$  0.001 as indicated by the bars.

361x270mm (72 x 72 DPI)

Figure E2

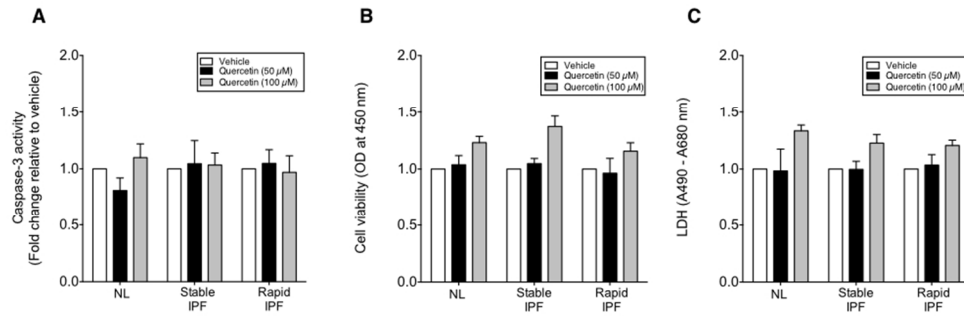

Figure E2. Quercetin alone does not induce apoptosis in senescent primary lung fibroblasts. Caspase-3 activity, cell viability, and lactate dehydrogenase (LDH) release by senescent lung fibroblasts from normal patients (NL) and patients with stable (or rapidly progressing IPF (stable IPF and rapid IPF, respectively) following 24 hours treatment with quercetin (50 or 100 μM) or vehicle (0.05%DMSO). Caspase-3 activity was expressed as relative fluorescence units (RFU) normalized to β-actin levels, cell viability as OD values at 450 nm, and LDH release as the difference in the absorbance values at 490 and 680 nm. Data are presented as means ± SEM, n = 3 - 4 per group.

361x270mm (72 x 72 DPI)

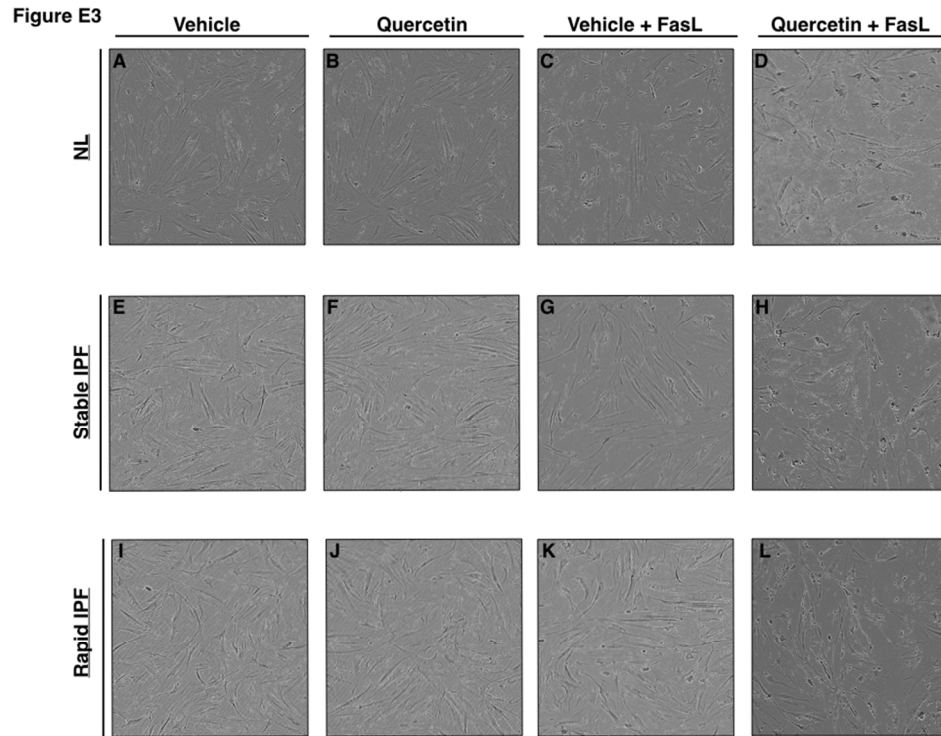

Figure E3. Representative phase-contrast images of senescent human lung fibroblasts derived from normal patients (NL) (A - D) and patients with stable (E - H) or rapidly progressing (I - L) IPF (stable IPF and rapid IPF, respectively) treated with: vehicle, quercetin (50  $\mu$ M), FasL (75 ng/mL), quercetin + FasL for 24 hours. Images were taken at 10x magnification and n = 3 per group.

361x270mm (72 x 72 DPI)

Figure E4

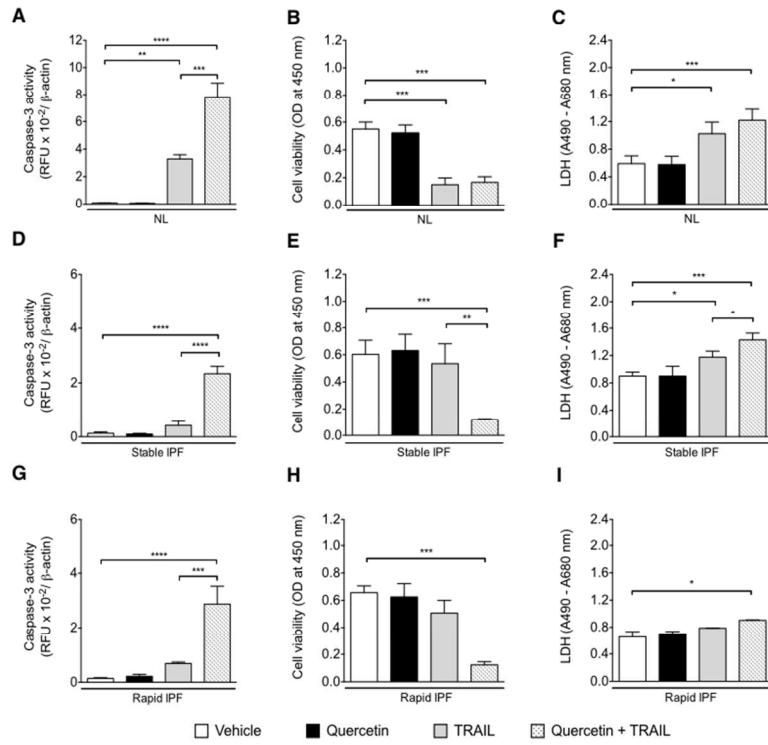

Figure E4. Quercetin increases the susceptibility to TRAIL-induced apoptosis in senescent human lung fibroblasts. Caspase-3 activity, cell viability, and lactate dehydrogenase (LDH) release by senescent fibroblasts from normal lungs (NL) (A-C) and the lungs of patients with stable (D-F) or rapidly progressing (G-I) IPF (stable IPF and rapid IPF, respectively) following 24 hours treatment with vehicle (0.05%DMSO), quercetin (50 μM), TRAIL (100 ng/mL), or quercetin + TRAIL. Caspase-3 activity was expressed as relative fluorescence units (RFU) normalized to β-actin levels, cell viability as OD values at 450 nm, and LDH release as the difference in the absorbance values at 490 and 680 nm. Data are presented as means ± SEM, n = 3-4 per group. \*P ≤ 0.05, \*\*P ≤ 0.01, \*\*\*P ≤ 0.001, and \*\*\*\*P ≤ 0.0001 as indicated by the bars.

361x270mm (72 x 72 DPI)

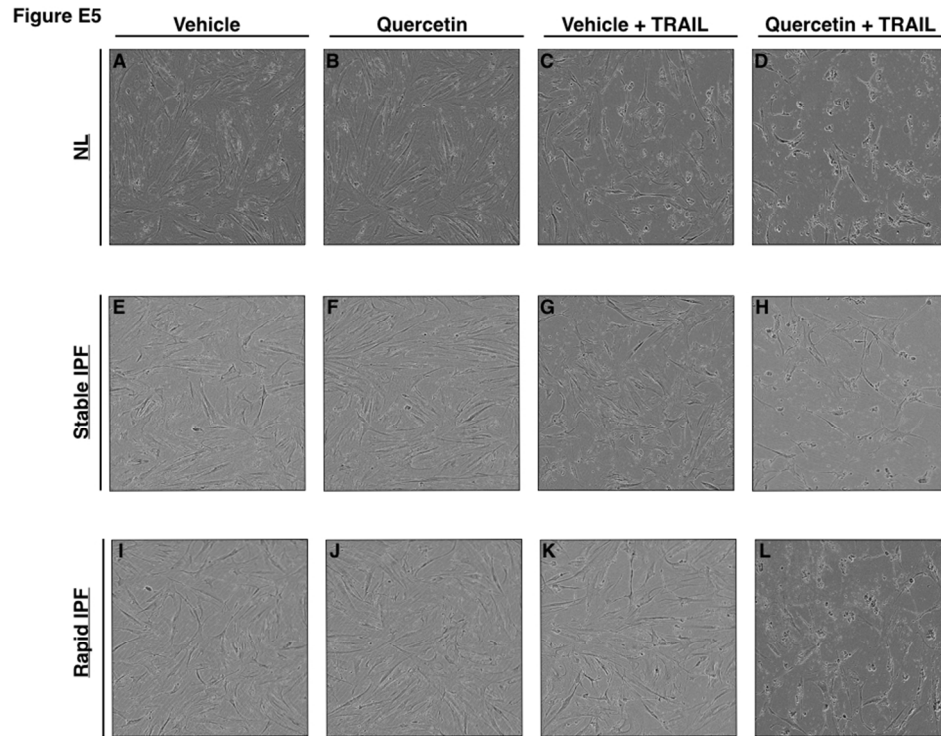

Figure E5. Representative phase-contrast images of senescent human lung fibroblasts derived from normal patients (NL) (A – D) and patients with stable (E – H) or rapidly progressing (I – L) IPF (stable IPF and rapid IPF, respectively) treated with: vehicle, quercetin (50  $\mu$ M), cross-linked TRAIL (TRAIL) (100 ng/mL), quercetin + TRAIL for 24 hours. Images were taken at 10x magnification and n = 3 per group.

361x270mm (72 x 72 DPI)

Figure E6

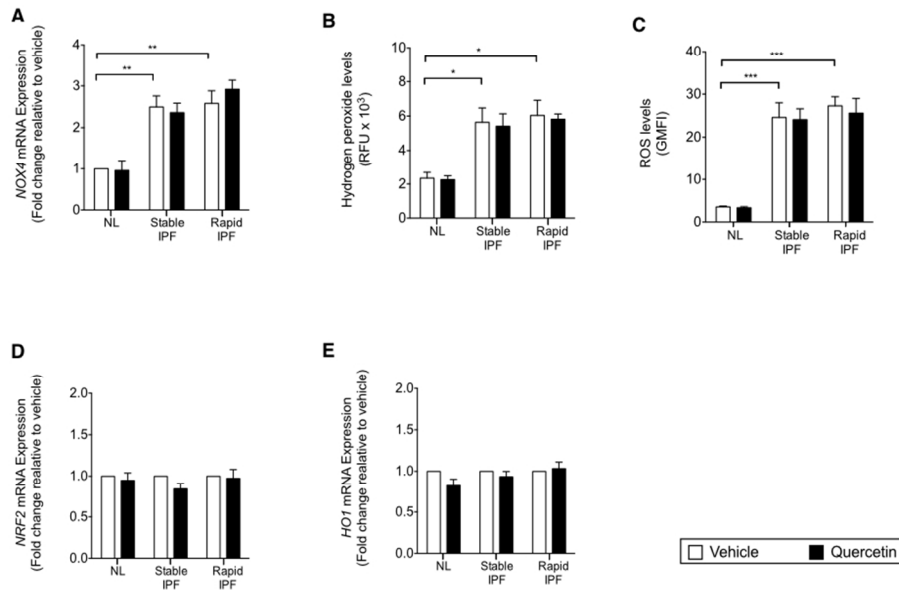

Figure E6. Quercetin's effect is independent of the oxidative status in senescent human lung fibroblasts. Effect of quercetin (50  $\mu$ M, 24 hours) on (A) total intracellular reactive oxygen species (ROS) levels, (B) hydrogen peroxide levels in the conditioned supernatant, and (C) NOX4 and (D) NRF2 mRNA expression in senescent lung fibroblasts isolated from normal patients (NL) and patients with stable or rapidly progressing IPF (stable IPF and rapid IPF, respectively). Data for ROS levels were expressed as geometric mean fluorescence intensity (GMFI) and hydrogen peroxide levels as relative fluorescence units (RFU). Data are presented as means  $\pm$  SEM, n = 3-4 per group.

361x270mm (72 x 72 DPI)

**Figure E7**

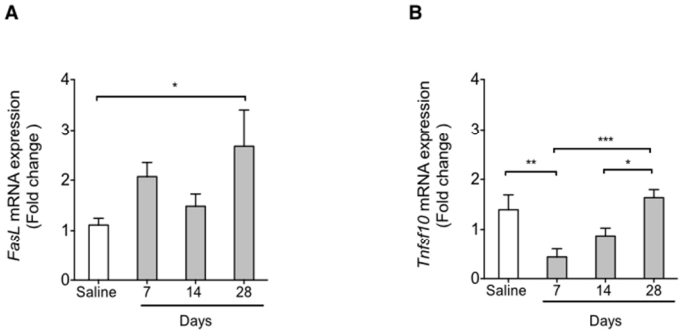

Figure E7. Whole lung (A) FasL and (B) TRAIL mRNA expression 7, 14, and 28 days post bleomycin-induced injury. Data are presented as means  $\pm$  SEM, n = 7 mice per group. \*P  $\leq$  0.05, \*\*P  $\leq$  0.01, and \*\*\*P  $\leq$  0.001 as indicated by the bars.

361x270mm (72 x 72 DPI)

**Figure E8**

**A**

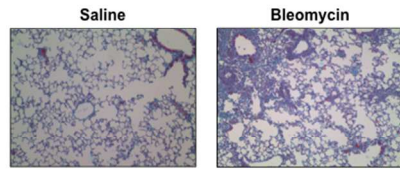

Figure E8. Masson's trichrome blue staining for collagen in the lungs of aged mice. Aged C57BL/6 mice received intratracheal (i.tr.) instillation of bleomycin (1.25 U/kg) or saline (equal volume). (A) Masson's trichrome staining for collagen at day 7 (100x magnification). n = 7-10 mice per group.

361x270mm (72 x 72 DPI)
